# Supplementary material for: Emerging investigator series: dispersed transition metals on a nitrogen-doped carbon nanoframework for environmental hydrogen peroxide detection
Source: Royal Society of Chemistry journal article supplement (doi:10.1039/c8en00498f), 2018-01-01
Supplement: c8en00498f1.pdf [file c8en00498f1.pdf]

## Supporting Information

### **Dispersed Transition Metal on Nitrogen Doped Carbon Nanoframework for Environmental Hydrogen Peroxide Detection**

Zehui Li,<sup>a,†</sup> Yuheng Jiang,<sup>b,†</sup> Chenming Liu,<sup>c,\*</sup> Zhuoya Wang,<sup>d</sup> Zhiqin Cao,<sup>c</sup> Yi Yuan,<sup>d</sup> Mingjie Li,<sup>e</sup>

Yaling Wang,<sup>a</sup> Daliang Fang,<sup>b</sup> Zhuang Guo,<sup>b</sup> Guangjin Zhang,<sup>c</sup> Dongbin Wang,<sup>a</sup> and Jingkun Jiang<sup>a,\*</sup>

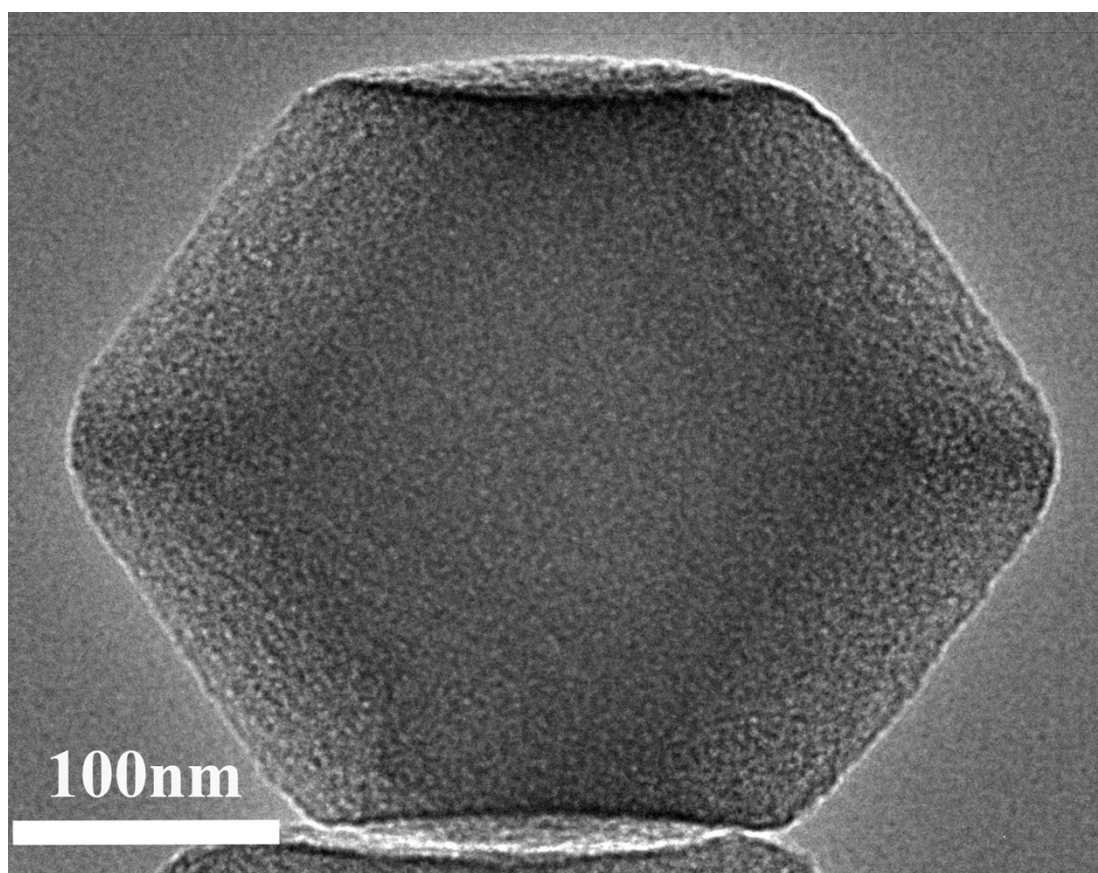

**Figure S1.** SEM images of N/C.

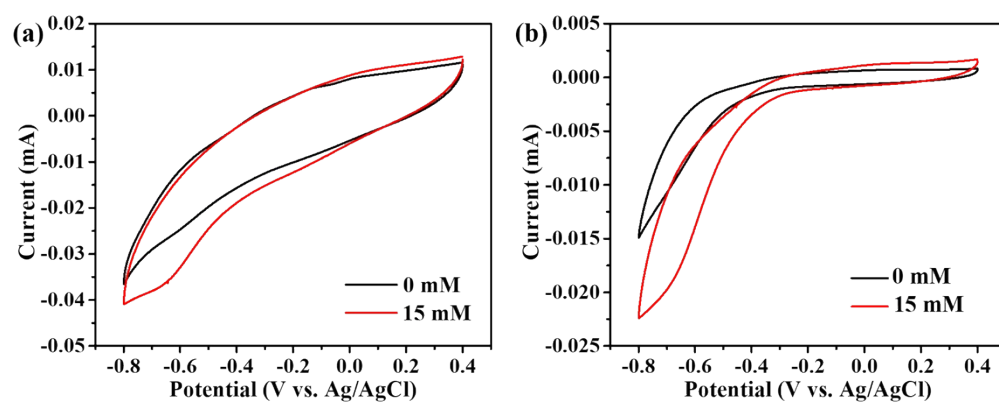

**Figure S2.** CVs of (a) 1% Cu-N/C and (b) 1% Mn-N/C in  $N_2$ -saturated 0.4 M PBS (PH=7.0) with 0 and 15 mM  $H_2O_2$ .

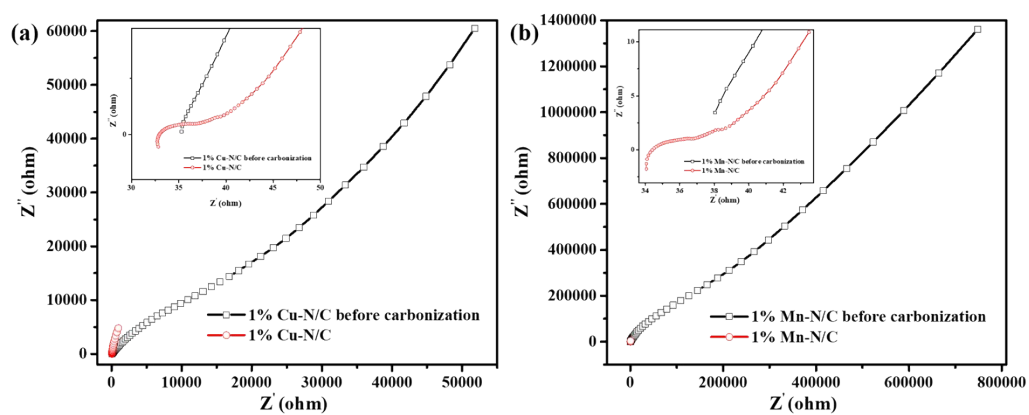

**Figure S3.** EIS of (a) 1% Cu-N/C and (b) 1% Mn-N/C before and after carbonization in  $N_2$ -saturated 0.4 M PBS (PH=7.0).

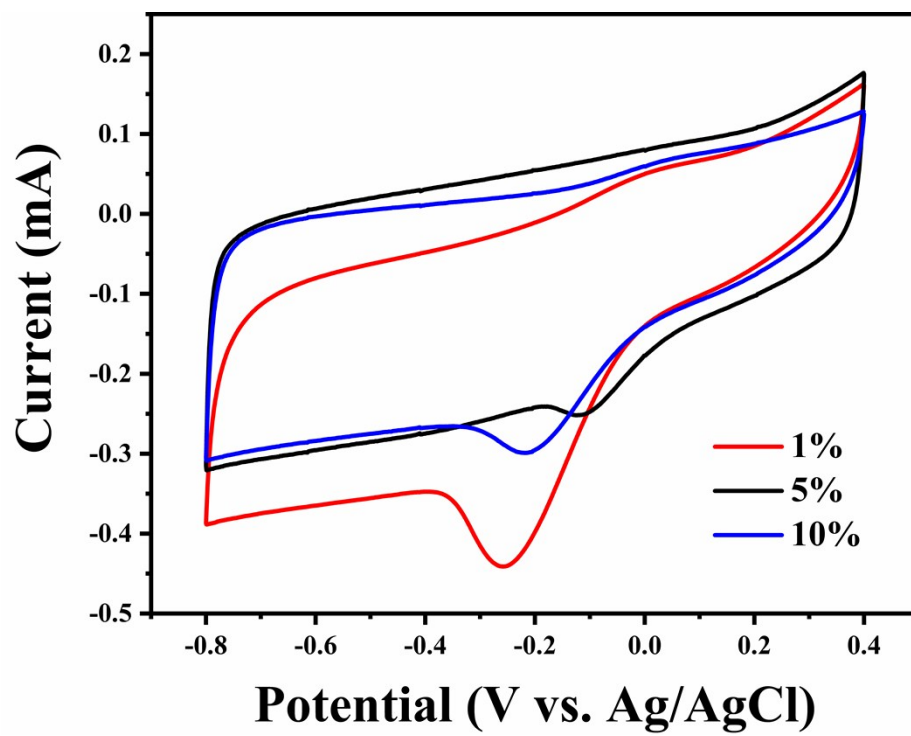

**Figure S4.** CVs of 1% Mn-N/C, 5% Mn-N/C, 10% Mn-N/C in N<sub>2</sub>-saturated 0.4 M PBS (PH=7.0) with 15 mM H<sub>2</sub>O<sub>2</sub>.

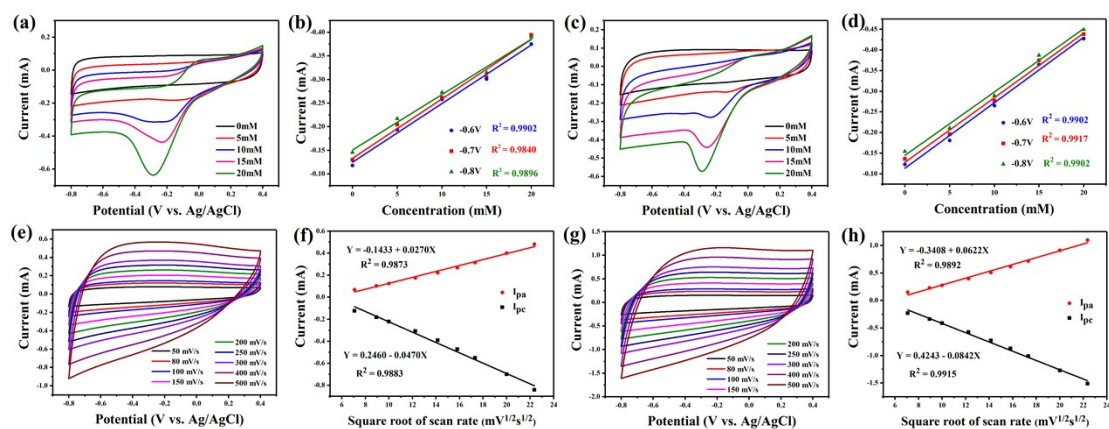

**Figure S5.** CVs of (a) 1% Cu-N/C and (c) 1% Mn-N/C electrodes in N<sub>2</sub>-saturated 0.4 M PBS (PH=7.0) with different concentrations of H<sub>2</sub>O<sub>2</sub> (0, 5, 10, 15 and 20 mM). Calibration curve of the amperometric response to the concentration of H<sub>2</sub>O<sub>2</sub> from 0 mM to 20 mM at different negative potential (−0.6, −0.7 and −0.8 V) for (b) 1% Cu-N/C and (d) 1% Mn-N/C. CVs of (e) 1% Cu-N/C and (g) 1% Mn-N/C electrodes in 1 mM H<sub>2</sub>O<sub>2</sub> solution with different scanning rate (50, 80, 100, 150, 200, 250, 300, 400 and 500 mV/s). Calibration curve of the amperometric response to the square root of scan rate for (f) 1% Cu-N/C and (h) 1% Mn-N/C.

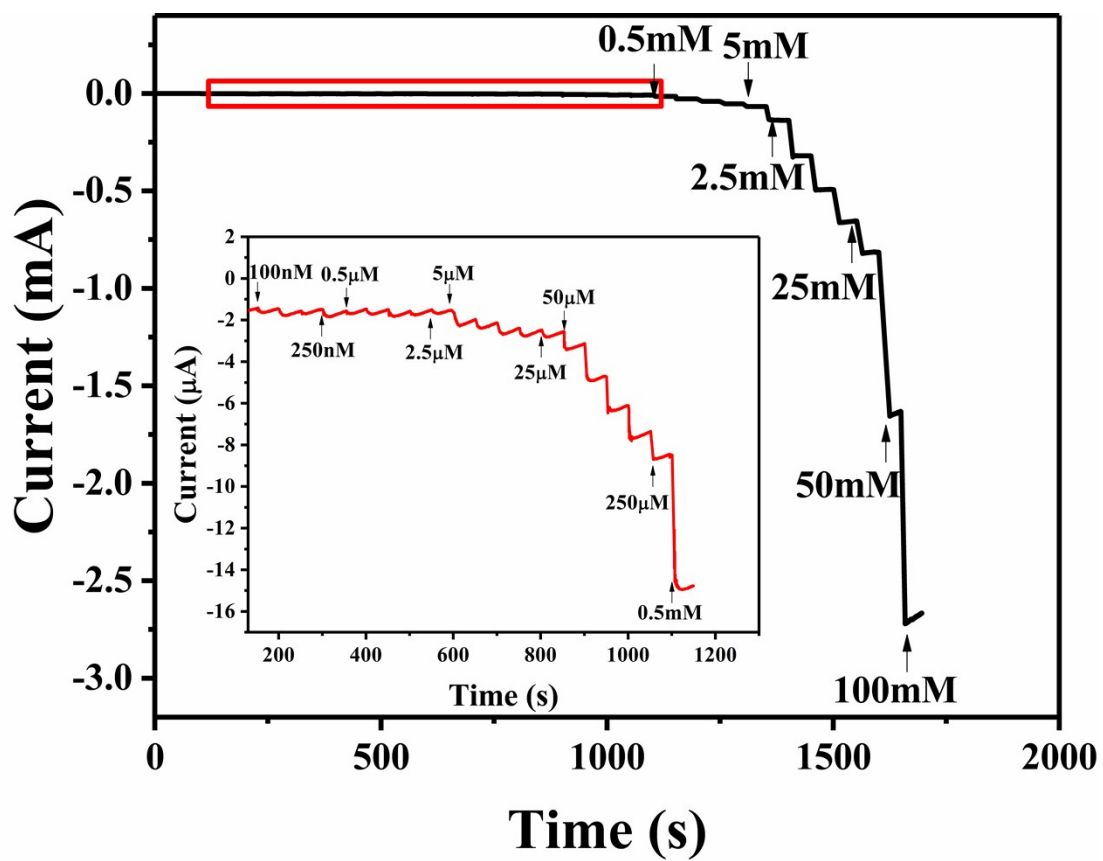

**Figure S6.** Chronoamperometric curves of 1% Mn-N/C with the successive addition of H<sub>2</sub>O<sub>2</sub> in PBS at

an applied potential of -0.7 V.

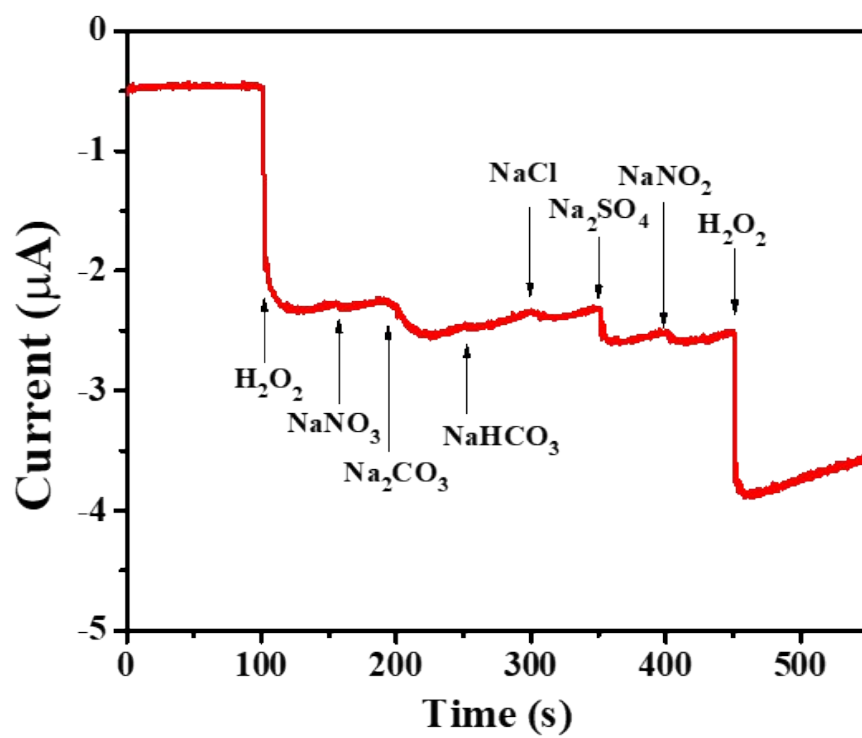

**Figure S7.** Chronoamperometric curves of 1% Mn-N/C electrode in a 0.1 M PBS buffer (pH=7) with the successive addition of 0.1 mM H<sub>2</sub>O<sub>2</sub>, NaNO<sub>3</sub>, Na<sub>2</sub>CO<sub>3</sub>, NaHCO<sub>3</sub>, NaCl, Na<sub>2</sub>SO<sub>4</sub>, NaNO<sub>2</sub> and H<sub>2</sub>O<sub>2</sub> with a potential at -0.7 V.



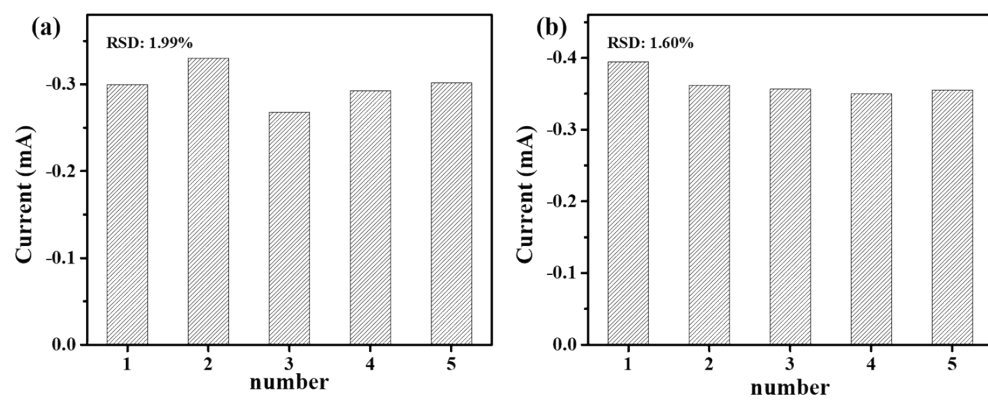

**Figure S8.** Current responses of five (a) 1% Cu-N/C and (b) 1% Mn-N/C modified GCEs to 10 mM  $\text{H}_2\text{O}_2$  at -0.7 V.

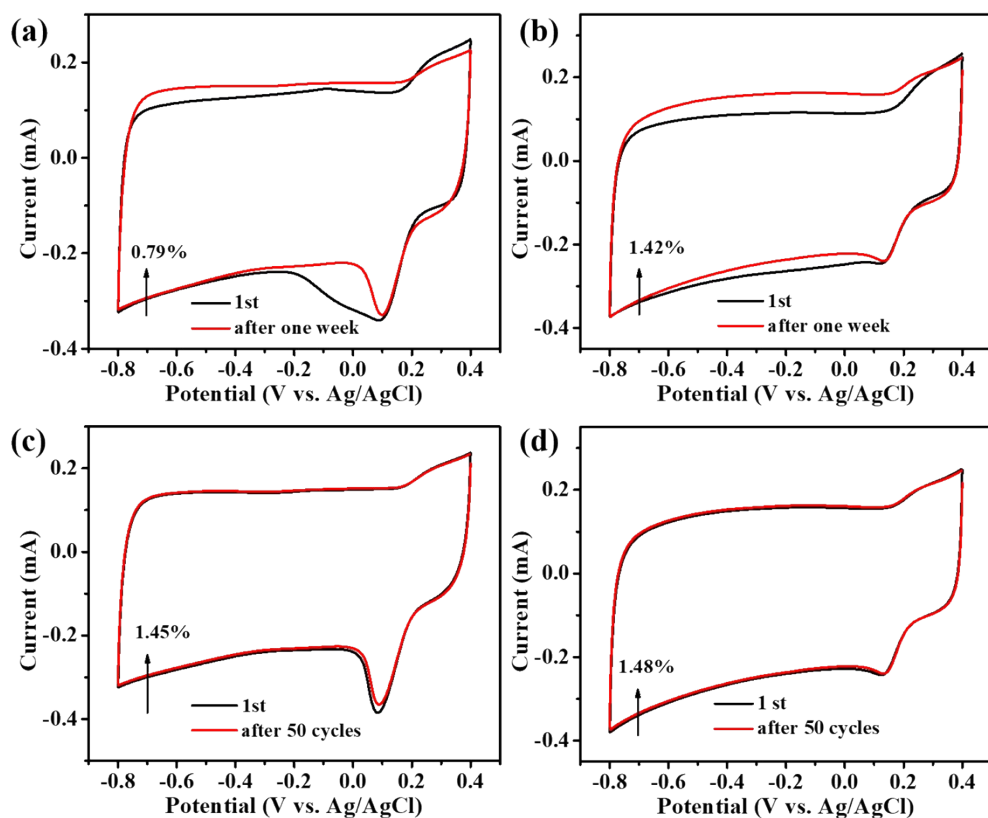

**Figure S9.** CV curves of (a) 1% Cu-N/C and (b) 1% Mn-N/C before and after one week in PBS solution

with 15 mM  $\text{H}_2\text{O}_2$ . CV curves of (a) 1% Cu-N/C and (b) 1% Mn-N/C before and after 50 cycles of CV.

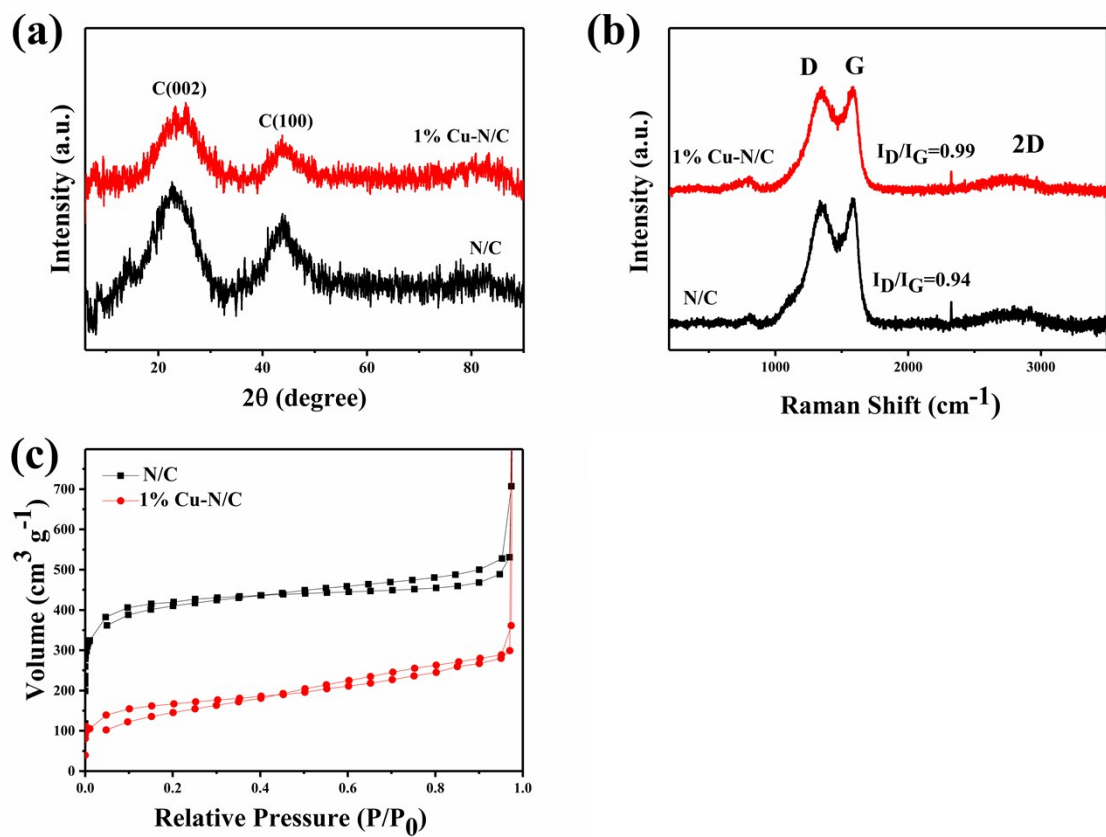

**Figure S10.** (a) XRD patterns (b) Raman spectra of N/C and 1% Cu-N/C and (c)  $\text{N}_2$  adsorption–desorption isotherms.

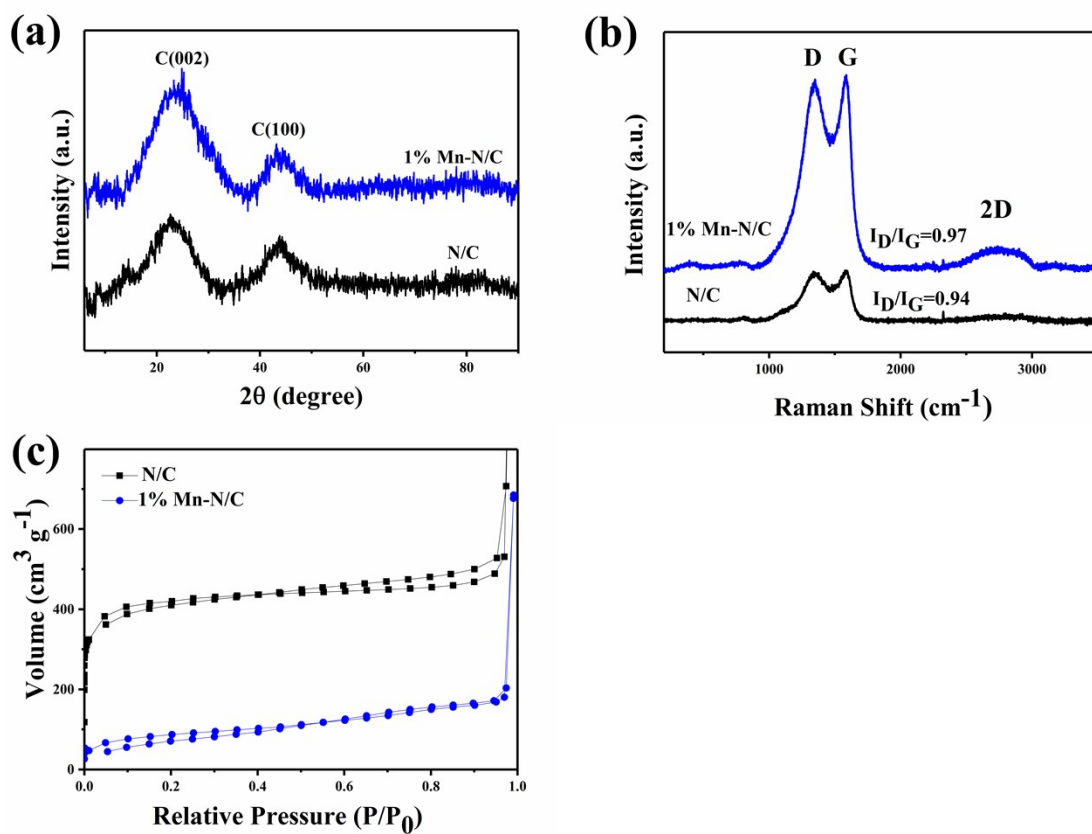

**Figure S11.** (a) XRD patterns (b) Raman spectra of N/C and 1% Mn-N/C and (c)  $\text{N}_2$  adsorption-desorption isotherms.

**Table S1.** Pore structure parameters of N/C, 1% Cu-N/C and 1% Mn-N/C.

| Materials | Porosity parameter                                  |                                                    |                                                      |                                      |
|-----------|-----------------------------------------------------|----------------------------------------------------|------------------------------------------------------|--------------------------------------|
|           | $S_{\text{BET}}$<br>( $\text{m}^2 \text{ g}^{-1}$ ) | $V_{\text{t}}$<br>( $\text{cm}^3 \text{ g}^{-1}$ ) | $V_{\text{mic}}$<br>( $\text{cm}^3 \text{ g}^{-1}$ ) | $V_{\text{mic}}/V_{\text{t}}$<br>(%) |
| N/C       | 1613.82                                             | 0.87                                               | 0.54                                                 | 62.07                                |
| 1% Cu-N/C | 616.77                                              | 0.47                                               | 0.18                                                 | 38.30                                |
| 1% Mn-N/C | 311.15                                              | 0.28                                               | 0.08                                                 | 28.57                                |

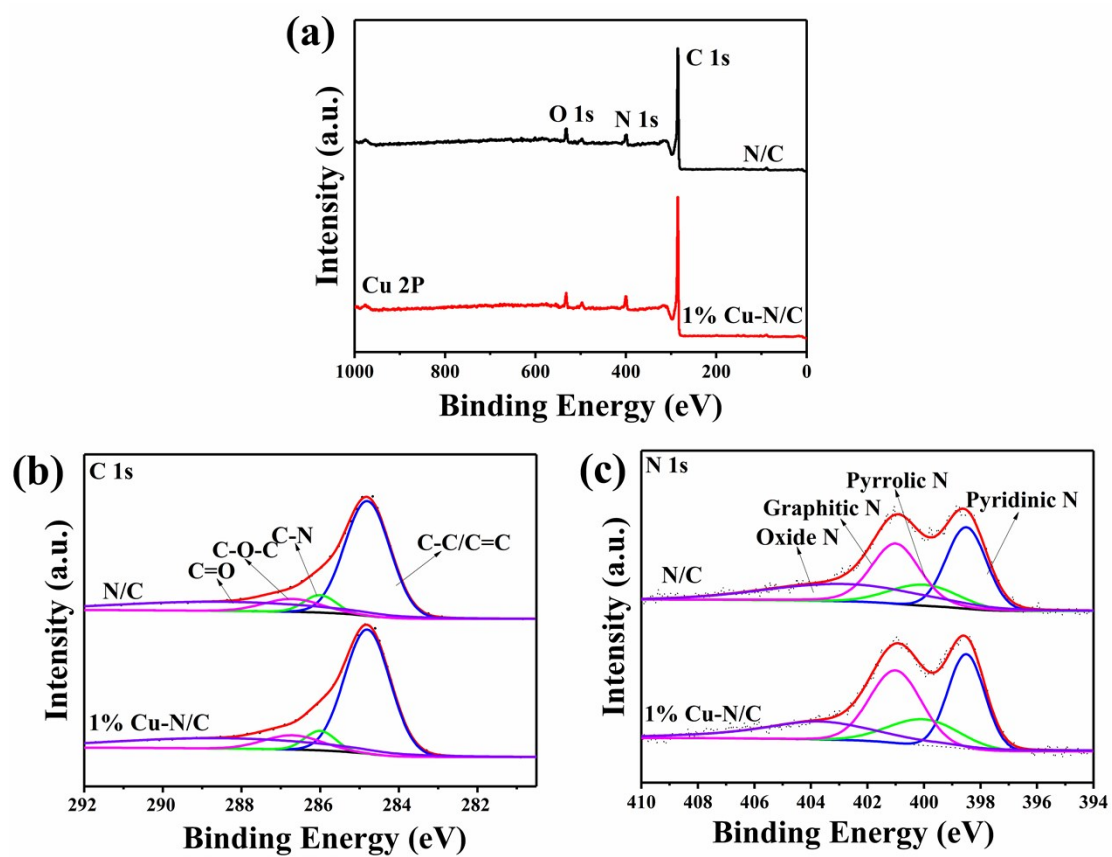

**Figure S12.** (a) XPS full spectra and high-resolution XPS spectra of (b) C 1s, (c) N 1s for NC and 1% Cu-N/C.

**Table S2.** Elemental content and percentage of C, N, Cu and Mn species of N/C, 1% Cu-N/C and 1% Mn-N/C from XPS.

| Materials | Elemental composition<br>(at %) |      |      |       |       |  | C (at %)    |      |       |       | N (at %)        |                |                 |             | Cu (at %)       |                  | Mn (at %) |                  |
|-----------|---------------------------------|------|------|-------|-------|--|-------------|------|-------|-------|-----------------|----------------|-----------------|-------------|-----------------|------------------|-----------|------------------|
|           | C 1s                            | N 1s | O 1s | Cu 2p | Mn 2p |  | C-<br>C/C=C | C-N  | C-O-C | C=O   | pyridi<br>nic-N | pyrrol<br>ic-N | graphi<br>tic-N | Oxide<br>-N | Cu <sup>0</sup> | Cu <sup>II</sup> | Mn        | Mn <sup>II</sup> |
| N/C       | 85.57                           | 8.49 | 5.31 | -     | -     |  | 53.11       | 5.62 | 7.51  | 19.34 | 2.60            | 1.14           | 2.56            | 2.19        | -               | -                | -         | -                |
| 1% Cu-N/C | 86.71                           | 8.56 | 4.07 | 0.26  | -     |  | 51.70       | 6.55 | 7.71  | 20.75 | 2.46            | 1.30           | 2.72            | 2.08        | 0.14            | 0.16             | -         | -                |
| 1% Mn-N/C | 86.83                           | 8.38 | 4.23 | -     | 0.22  |  | 50.73       | 8.29 | 8.17  | 19.63 | 2.25            | 1.75           | 2.54            | 1.83        | -               | -                | 0.16      | 0.06             |

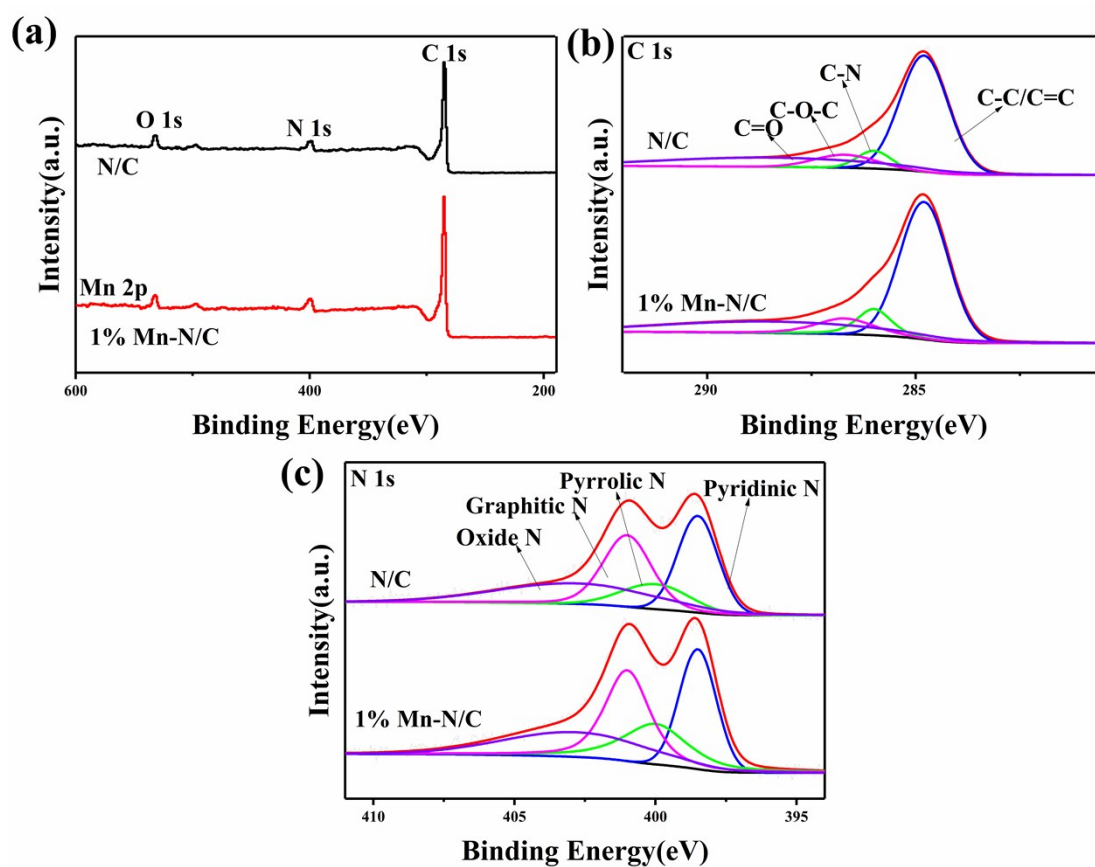

**Figure S13.** (a) XPS full spectra and high-resolution XPS spectra of (b) C 1s, (c) N 1s for 1% Mn-N/C.
